# Supplementary material
Source: publisher figshare collection journal article supplement (https://karger.figshare.com/ndownloader/files/14413421)
Supplement: Supplementary file 1 [file 14413421]

**Supplementary Table S1**. International Classification of Diseases, Ninth Revision, Clinical Modification diagnosis and V codes used to define comorbid conditions

| Comorbid Condition | ICD-9-CM Diagnosis and V Codes |
| --- | --- |
| Atherosclerotic heart disease | 411-414, V45.81, V45.82 |
| Congestive heart failure | 398.91, 402.x1, 404.x1, 404.x3, 422, 425, 428, V42.1 |
| Dysrhythmia | 426, 427, V45.0, V53.3 |
| Cerebrovascular disease | 430-438 |
| Peripheral vascular disease | 440-444, 447, 451-453, 557 |
| Other cardiac | 420, 421, 423, 424, 429, 785.0-785.3, V42.2, V43.3 |
| Chronic obstructive pulmonary disease | 491-494, 496, 510 |
| Gastrointestinal bleeding | 456.0, 456.20, 530.21, 531.0-531.2, 531.4-531.6, 532.0-532.2, 532.4-532.6, 533.0-533.2, 533.4-533.6, 534.0-534.2, 534.4-534.6, 535.x1, 537.83, 537.84, 569.85, 578.0 |
| Liver disease | 570, 571, 572.1, 572.4, 573.1-573.3, V42.7 |
| Cancer | 140-172, 174-208, 230, 231, 233, 234 |
| Diabetes | 250, 357.2, 362.0x, 366.41 |
| Hypertension | 362.11, 401-405, 437.2 |

ICD-9-CM, International Classification of Diseases, Ninth Revision, Clinical Modification.
